# Supplementary material for: Nanoparticle-induced chemoresistance: the emerging modulatory effects of engineered nanomaterials on human intestinal cancer cell redox metabolic adaptation
Source: Royal Society of Chemistry journal article supplement (doi:10.1039/d2nr03893e), 2022-01-01
Supplement: d2nr03893e1.pdf [file d2nr03893e1.pdf]

## Supporting Information

### **Nanoparticles induced chemoresistance: The emerging modulatory effects of engineered nanomaterials on human intestinal cancer cells redox metabolic adaptation**

Zhuoran Wu,<sup>‡a</sup> Magdiel Ingrid Setyawati,<sup>‡a</sup> Hong Kit Lim,<sup>a</sup> Kee Woei Ng,<sup>abc</sup> Chor Yong Tay<sup>\*ab</sup>

<sup>a</sup>School of Materials Science and Engineering, Nanyang Technological University, 50 Nanyang Avenue, Singapore 639798, Singapore.

<sup>b</sup>Environmental Chemistry and Materials Centre, Nanyang Environment & Water Research Institute, 1 Cleantech Loop, CleanTech One, Singapore 637141, Singapore.

<sup>c</sup>Center for Nanotechnology and Nanotoxicology, Department of Environmental Health, Harvard T.H. Chan School of Public Health, Boston, MA 02115, USA.

<sup>‡</sup>These authors contributed equally to this work.

\*Corresponding author: Chor Yong Tay ([cytay@ntu.edu.sg](mailto:cytay@ntu.edu.sg))

# Supplementary Figures

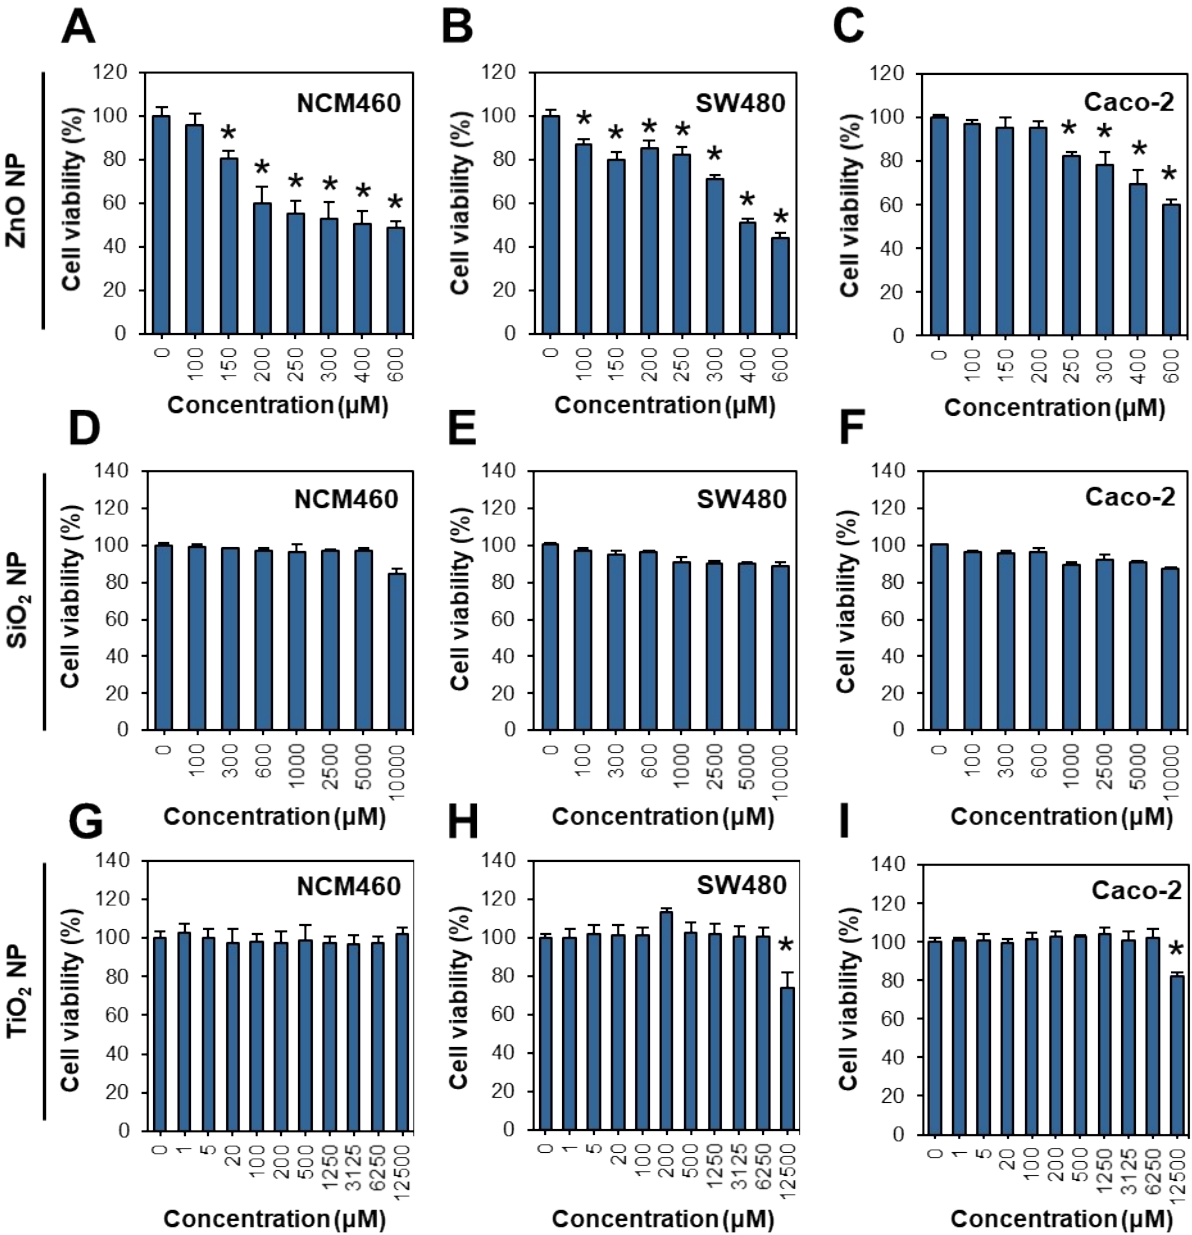

**Figure S1.** Dose-response curves of (A-C) ZnO NPs, (D-E) SiO<sub>2</sub> NPs and (G-I) TiO<sub>2</sub> NPs treated normal colorectal cells NCM460, and colorectal cancer cells SW480 and Caco-2 at varying concentrations for 24h. Data are mean ± SD, n=3, One-way ANOVA Tukey post-hoc HSD, \* states the significant difference between the sample groups and the negative control. *p*<0.05.

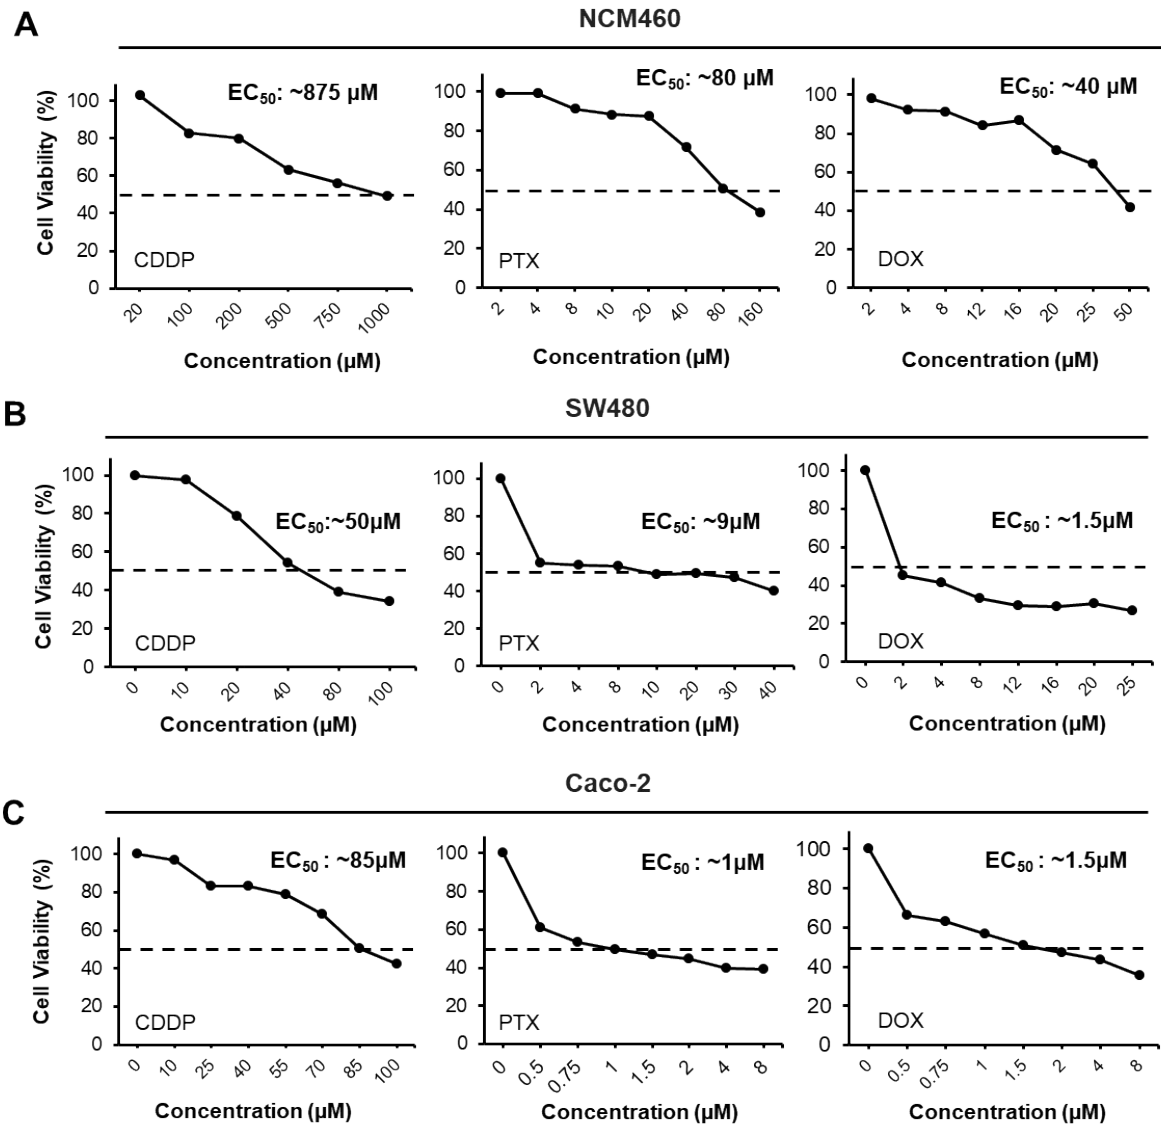

**Figure S2.** Dose response profile following anticancer drugs treatment (24h) in (A) NCM460 (B) SW480 and (C) Caco-2 cells. Half maximal effective concentration ( $EC_{50}$ ) of each drug for the cell lines are noted on the graphs.

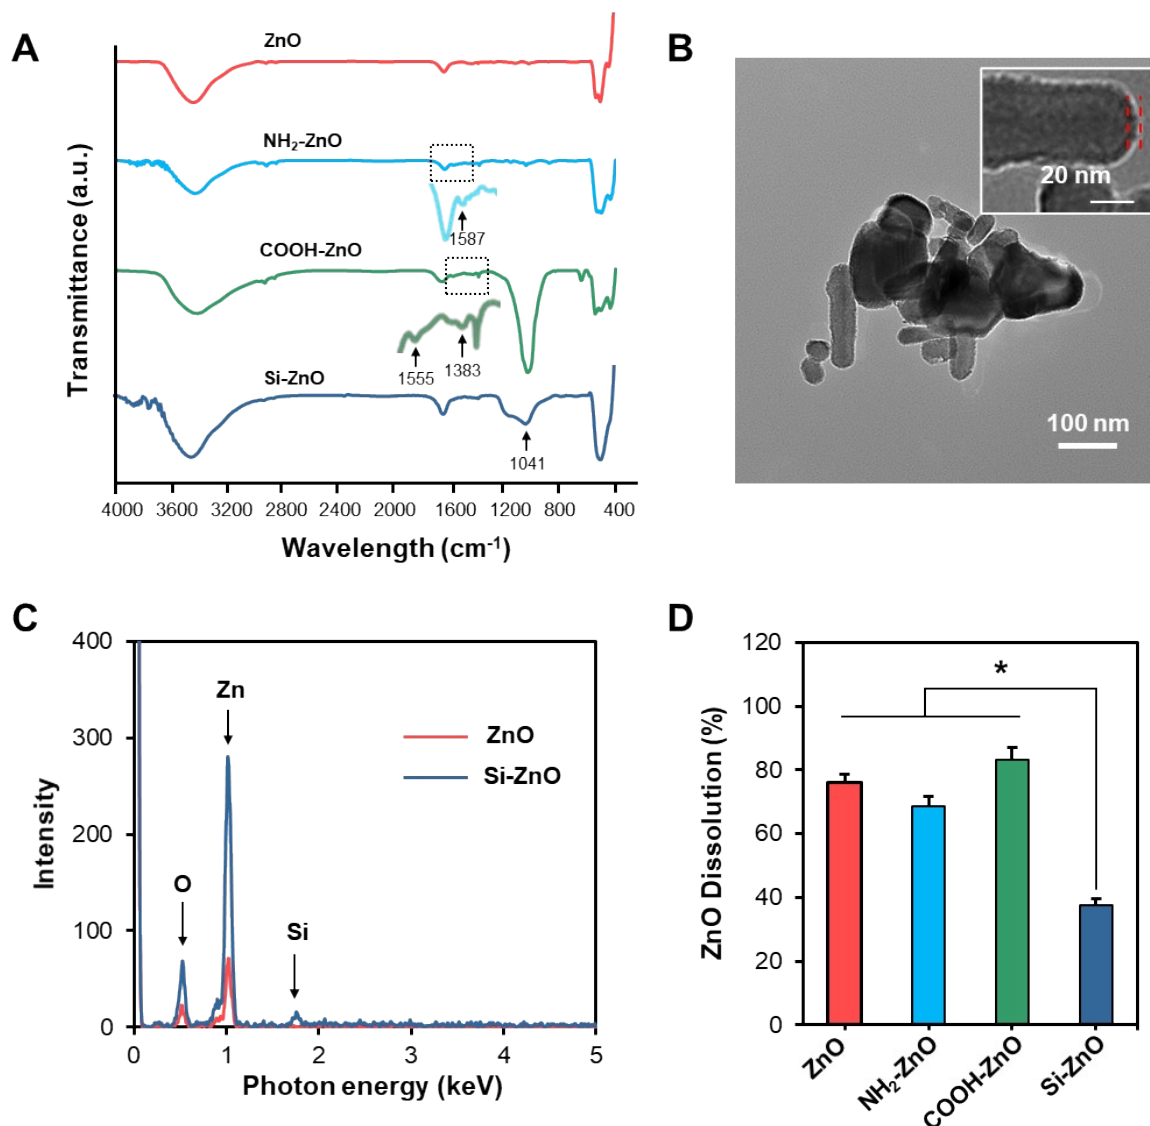

**Figure S3.** Physical characterization of the pristine ZnO, amine-functionalized (NH<sub>2</sub>-ZnO), carboxylic acid functionalized (COOH-ZnO) and silica coated (Si-ZnO) NPs. **(A)** FTIR spectra of the ZnO NPs variants showing the respective characteristic peaks. **(B)** Representative TEM image of Si-ZnO depicting the presence of thin silica coat (~5.6 nm). **(C)** EDX spectra of ZnO and Si-ZnO NPs revealed successful coating of the silica shell onto the core ZnO NPs. **(D)** *in vitro* dissolution of the ZnO NPs at the lysosomal environment (pH 4.7). Data presented are mean  $\pm$  S.D., n=3, One-way ANOVA Tukey post-hoc HSD, \* states the significant difference between the indicated ZnO NP variants and the Si-ZnO NP group.  $p < 0.05$ .

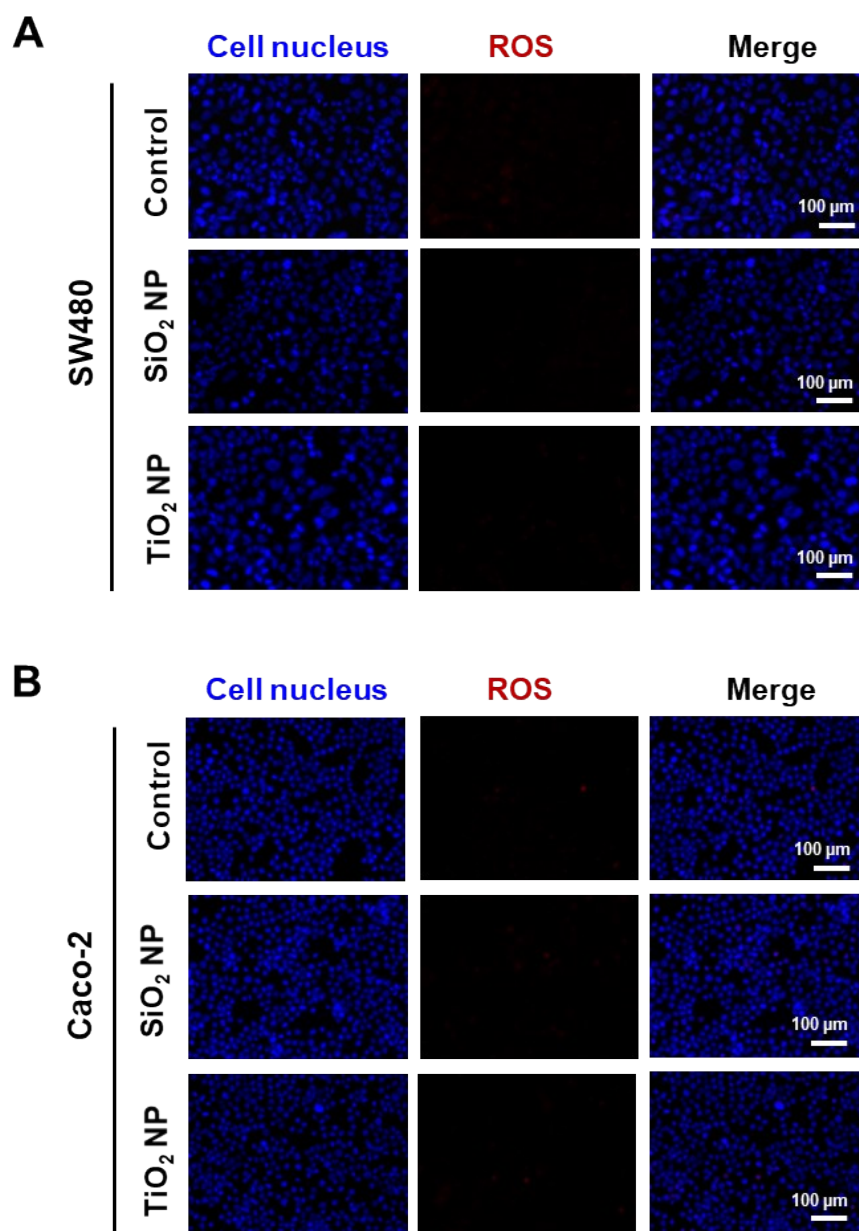

**Figure S4.** Representative fluorescence images of SiO<sub>2</sub> and TiO<sub>2</sub> NPs treated (A) SW480 and (B) Caco-2 cells counterstained for the cell nucleus (blue) and intracellular ROS (red).

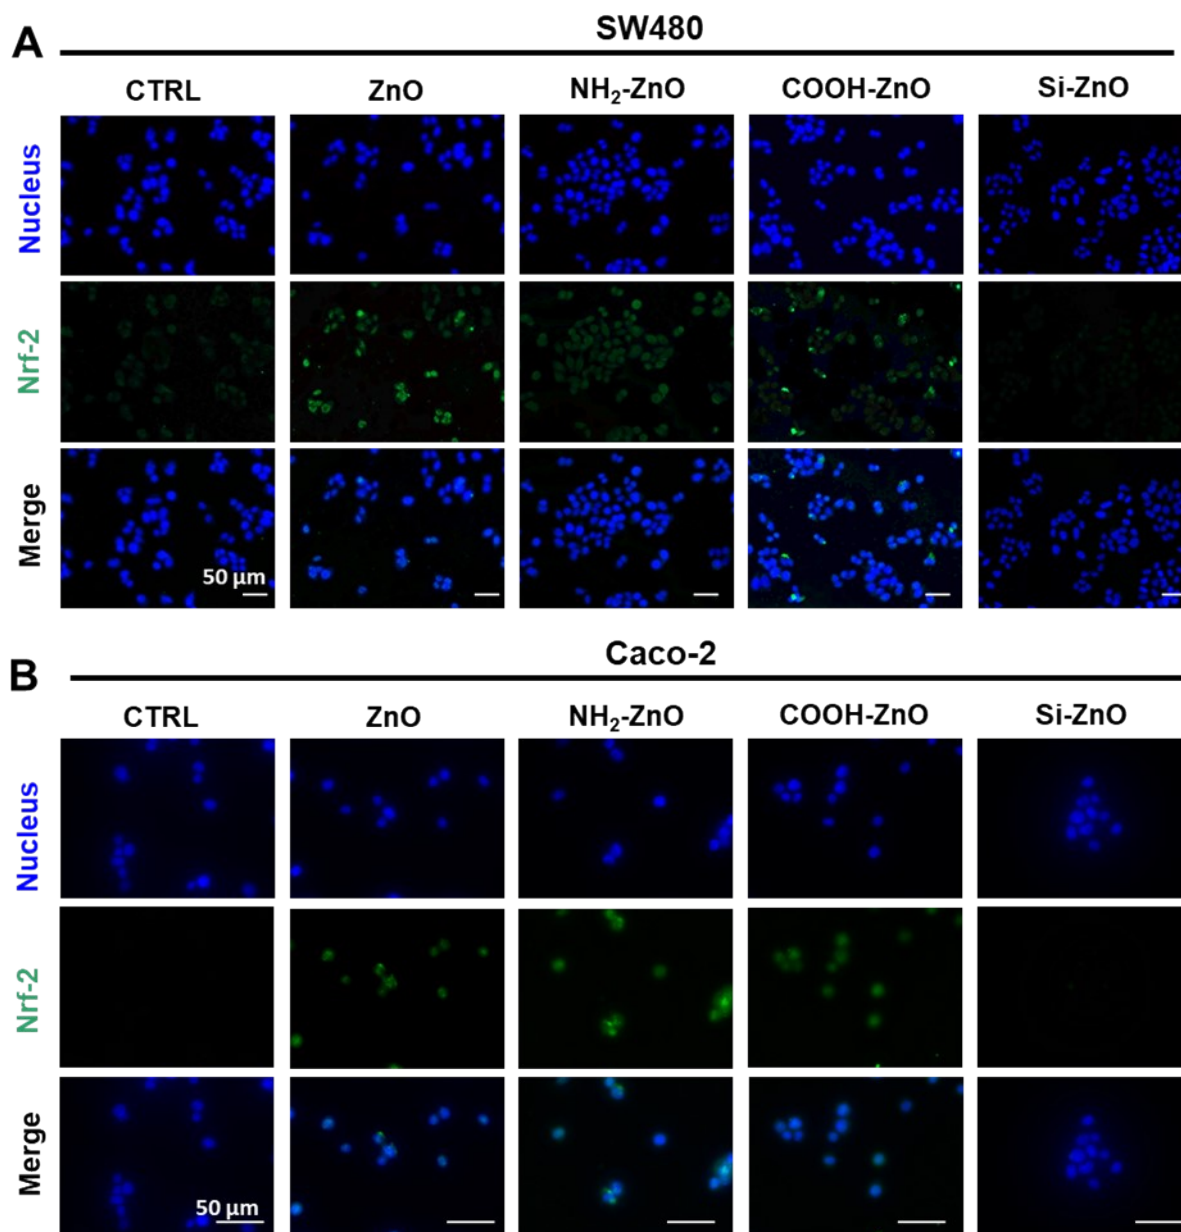

**Figure S5.** ZnO NPs induced increase expression of Nrf2. Representative immunofluorescence images of (A) SW480 and (B) Caco-2 cells counterstained for Nrf2 (green) and cell nucleus (blue) following their exposure to the ZnO NPs (20  $\mu$ M, 4h). Scale bar = 50  $\mu$ m.

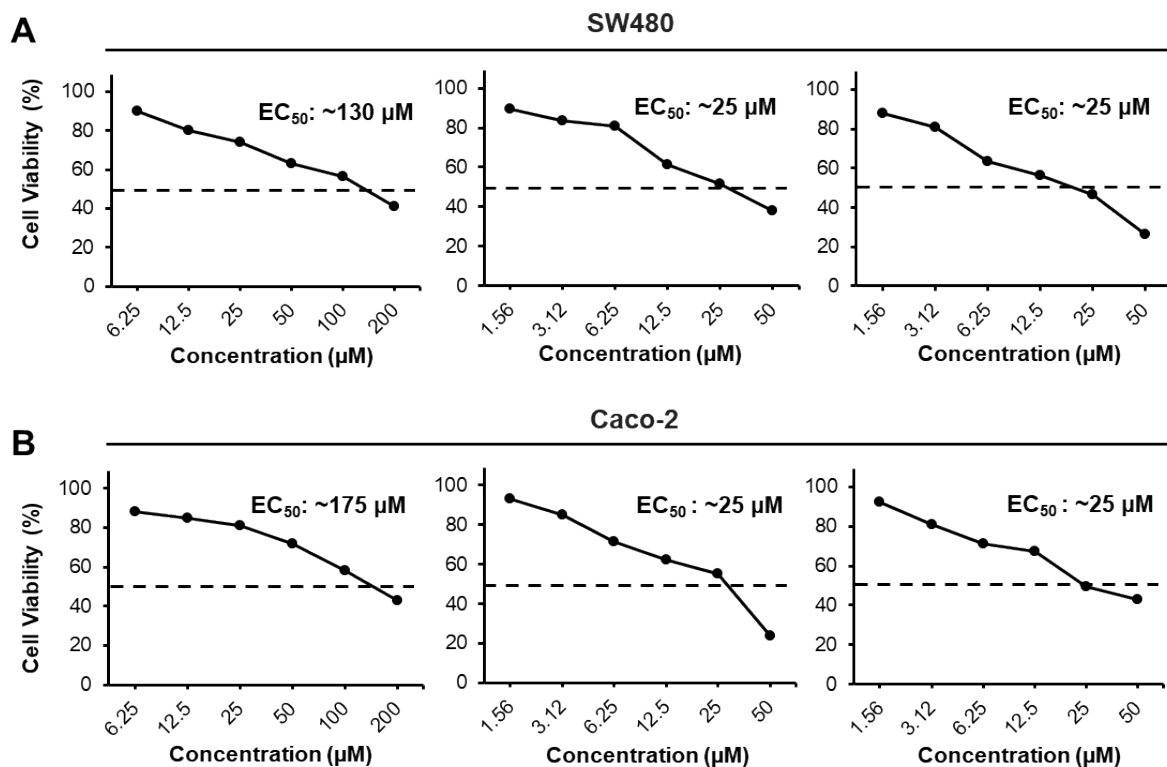

**Figure S6.** Dose response profile following anticancer drugs treatment (24h) in **(A)** SW480 and **(B)** Caco-2 tumor spheroids. Half maximal effective concentration ( $EC_{50}$ ) of each drug for the two tumor spheroids was noted on the graphs.
